# Supplementary material for: A simple synthesis of magnetic metal implanted hierarchical porous carbon networks for efficient microwave absorption
Source: Royal Society of Chemistry journal article supplement (doi:10.1039/d1tc03217h), 2021-01-01
Supplement: d1tc03217h1.pdf [file d1tc03217h1.pdf]

## Support information

### Facile synthesis of magnetic metal implanted hierarchical porous carbon networks for efficient microwave absorption

Yongmeng Liu,<sup>ab</sup> Erchuang Fan,<sup>ab</sup> Ruohan Hou,<sup>ab</sup> Peng Zhang<sup>\*abc</sup>, Shijie Zhang<sup>\*abc</sup> and  
Guosheng Shao<sup>\*abc</sup>

<sup>a</sup> School of Materials Science and Engineering, Zhengzhou University, Zhengzhou 450001, China.

<sup>b</sup> State Center for International Cooperation on Designer Low-Carbon & Environmental Materials (CDLCEM), Zhengzhou University, Zhengzhou 450001, China

<sup>c</sup> Zhengzhou Materials Genome Institute (ZMGI), Xinyang 450100, China

E-mail: zhangp@zzu.edu.cn; zhangsj123@zzu.edu.cn; gsshao@zzu.edu.cn

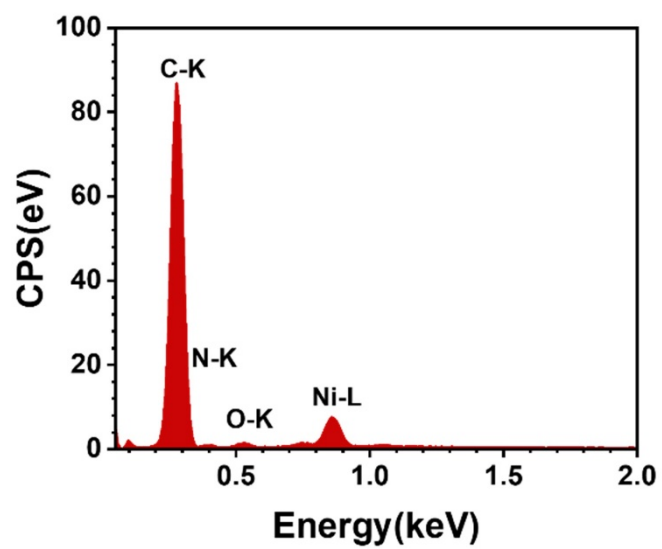

Fig. S1 EDX spectrum of HPC/Ni.

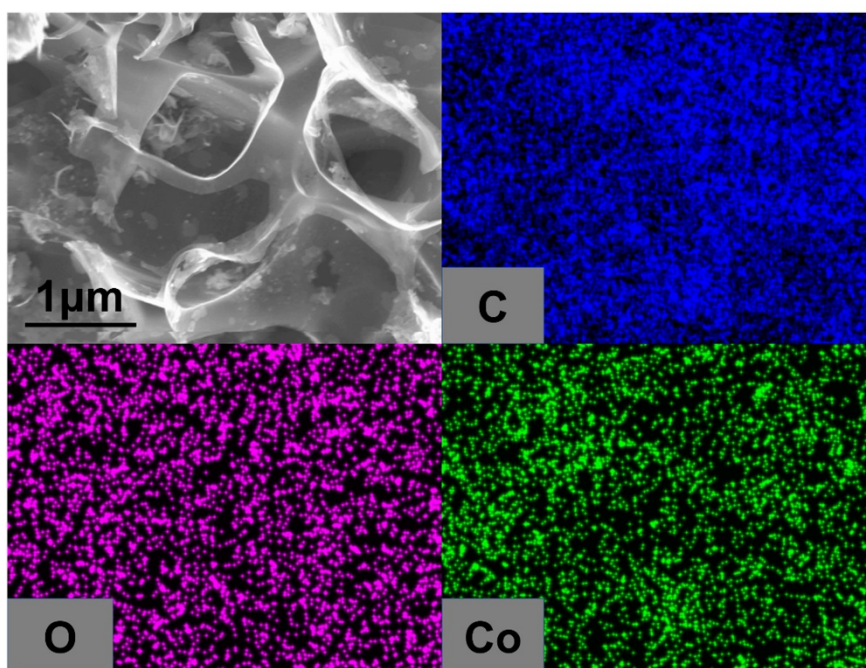

Fig. S2 EDX results of HPC/Co.

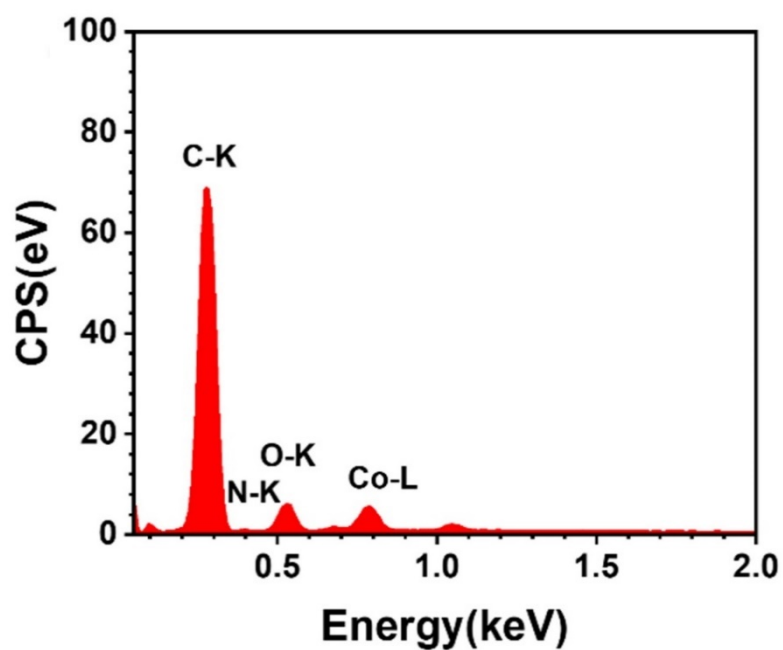

Fig. S3 EDX spectrum of HPC/Co.

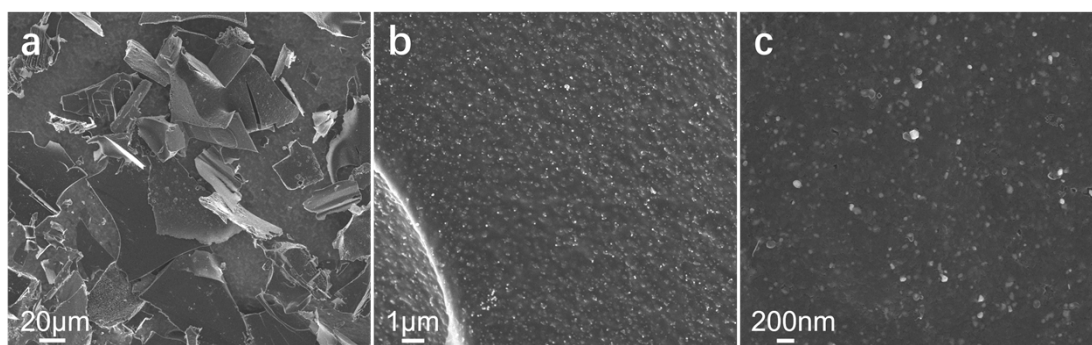

Fig. S4 (a, b) Low magnification and (c) high magnification SEM images of C/Ni.

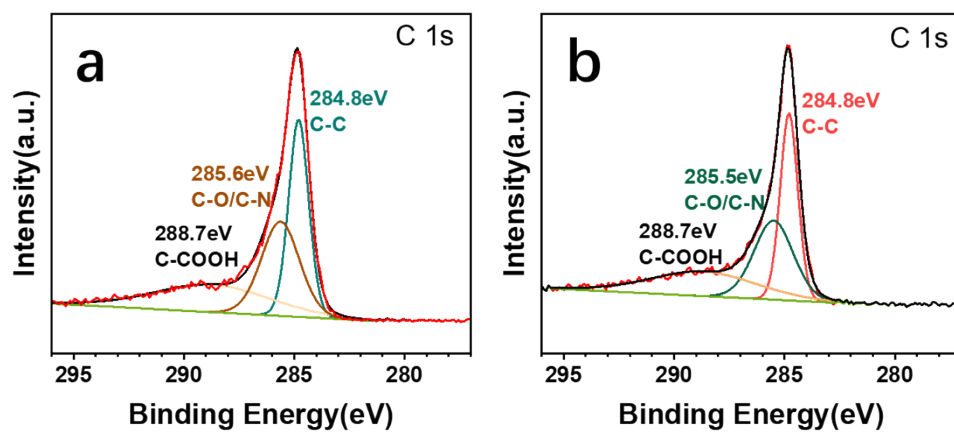

Fig. S5 The analysis results of C 1s XPS spectra of (a) HPC/Ni; (b) HPC/Co.

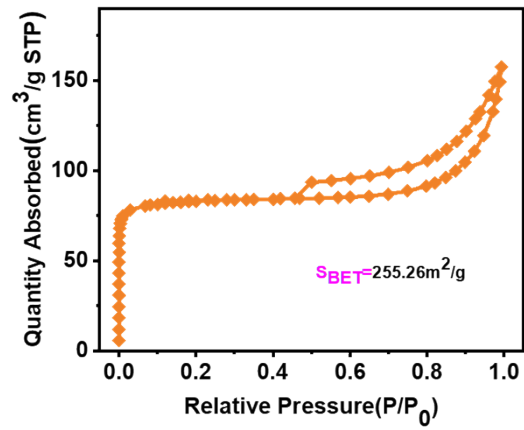

Fig. S6. nitrogen adsorption-desorption isotherms of HPC/Co.

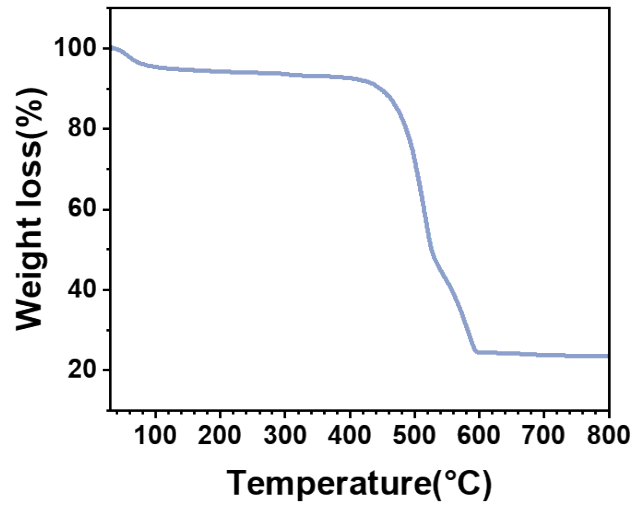

Fig. S7. TG curve of HPC/Ni in air atmosphere.

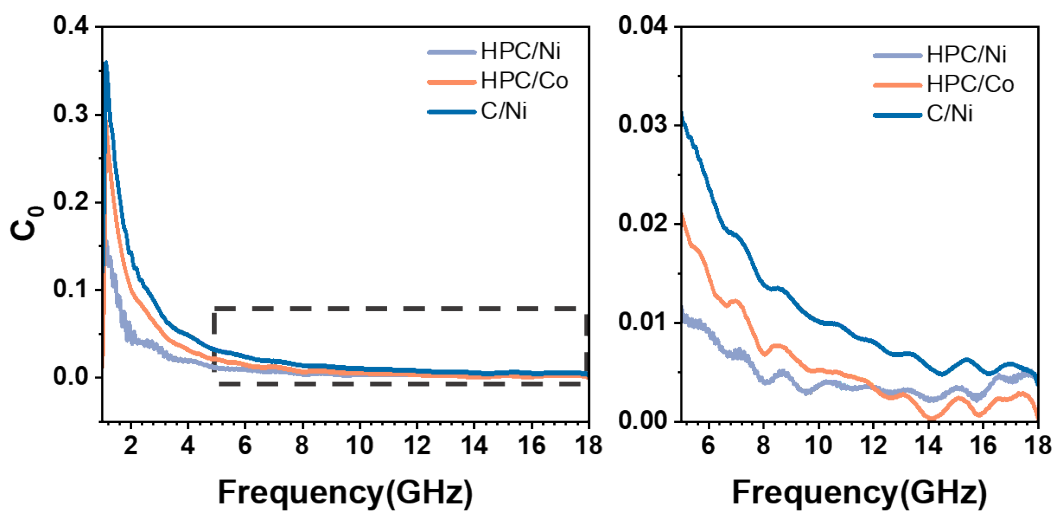

Figure S8. The values of  $\mu''(\mu')^{-2}f^1$  for C/Ni, HPC/Ni, and HPC/Co samples.

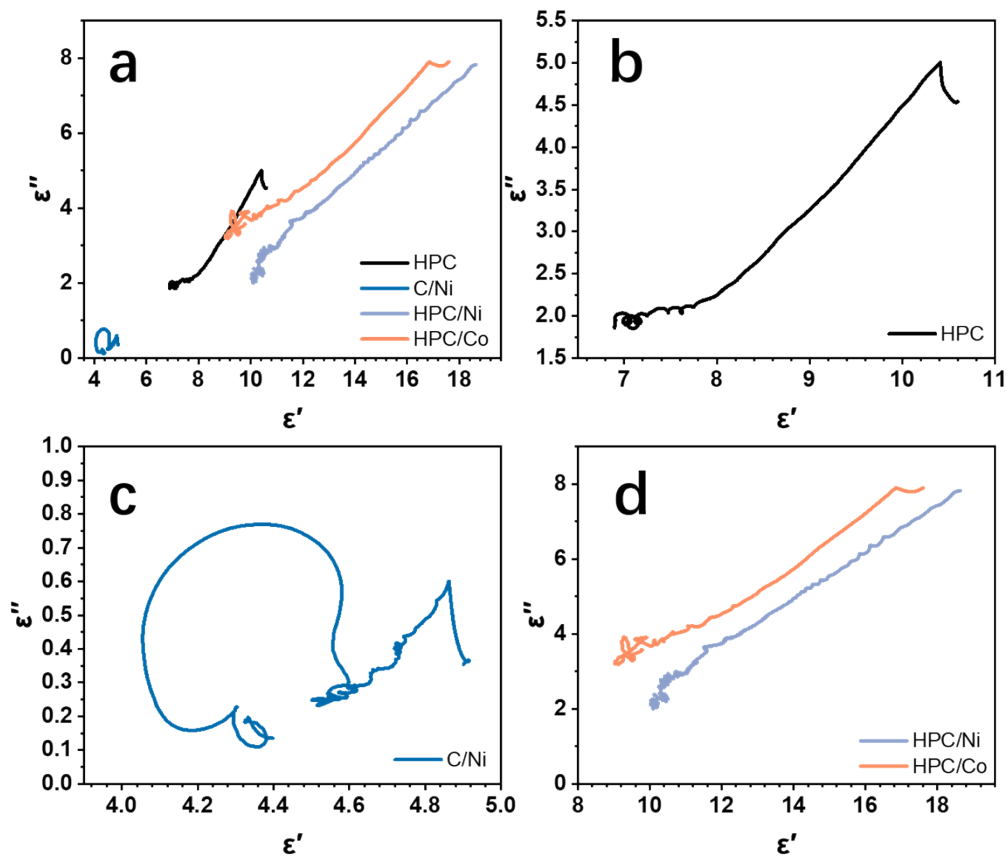

**Fig. S9** Cole-Cole semicircles of (a)all samples; amplified image of (b) HPC, (c) C/Ni, (d) HPC/Ni and HPC/Co.

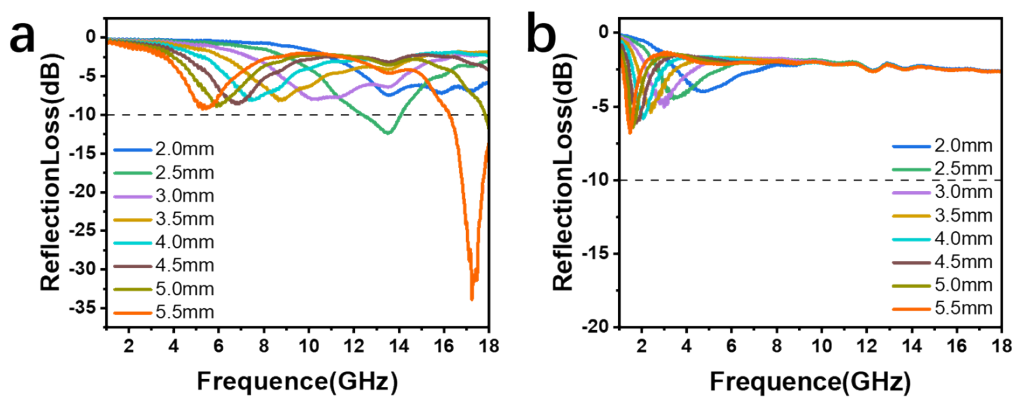

**Fig. S10** Reflection loss of HPC/Ni at different filler loading ratio of (a)10 wt.%, (b)30 wt.%.

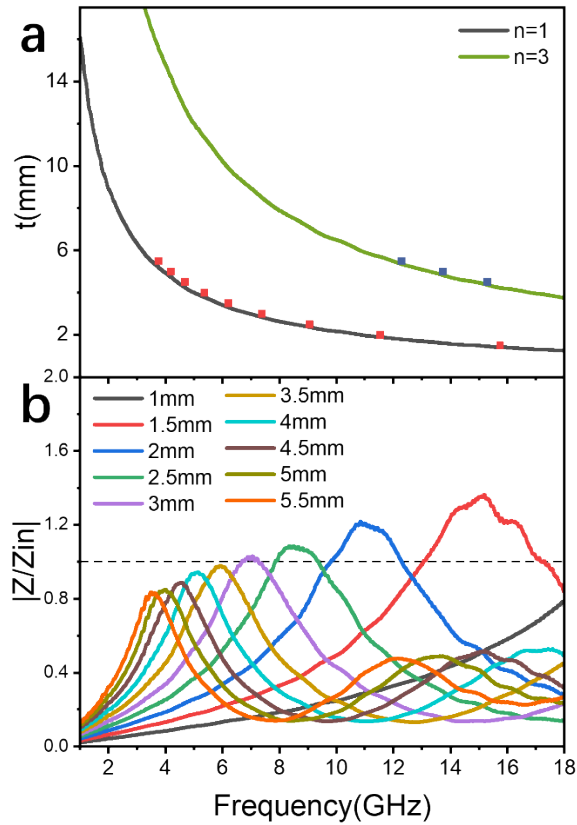

Fig. S11 (a) Matching thickness and (b) impedance matching of HPC/Ni sample.

Table S1 Comparison of electromagnetic wave absorption performance of various carbon-based materials.

| Absorber                              | Ratio (wt%) | RLmin (dB) | Matching Thickness(mm) | EAB (GHz) | Thickness (mm) | Reference |
|---------------------------------------|-------------|------------|------------------------|-----------|----------------|-----------|
| HPC/Ni                                | 20          | -58.7      | 2.9                    | 3.7       | 1.5            | This work |
| HPC/Co                                | 20          | -50.2      | 1.7                    | 4.9       | 1.7            | This work |
| Ni/C-500                              | 40          | -51.8      | 2.6                    | 3.5       | 2.6            | [6]       |
| CCPA1                                 | 40          | -43.38     | 2.5                    | 6.04      | 1.9            | [7]       |
| FDC-50 BC/                            | 30          | -52        | 2.5                    | 4.62      | 1.55           | [11]      |
| Fe <sub>3</sub> O <sub>4</sub> @ C-2  | 30          | -56.61     | 2.46                   | ≥6        | 1.46           | [19]      |
| NiCo <sub>2</sub> O <sub>4</sub> -h/G | 50          | -37.3      | 3                      | 2.6       | 1.5            | [57]      |
| AFC-3.5-10% Ni                        | 20          | -47        | 4.5                    | 3.8       | 1.75           | [59]      |
| RHPC/Fe                               | 25          | -21.8      | 1.4                    | 5.6       | 1.4            | [60]      |
| RHPC/Co                               | 25          | -40.1      | 1.8                    | 2.7       | 1.8            | [60]      |
